# Supplementary material for: Exploratory analysis of the neutrophil to lymphocyte ratio in patients with pulmonary arterial hypertension
Source: Springer Nature journal article supplement (doi:10.1186/s12890-017-0407-5), 2017-04-26
Supplement: MOESM3 [file 12249956]

# Supplementary Figure 1

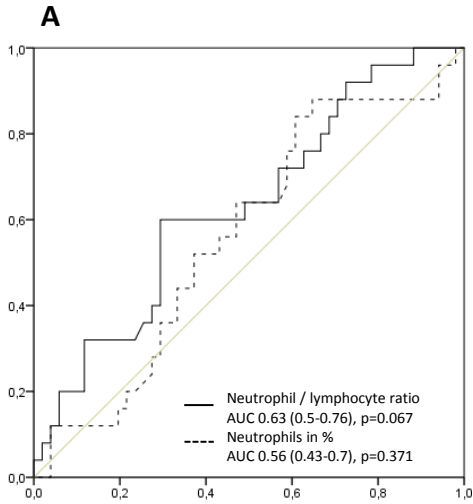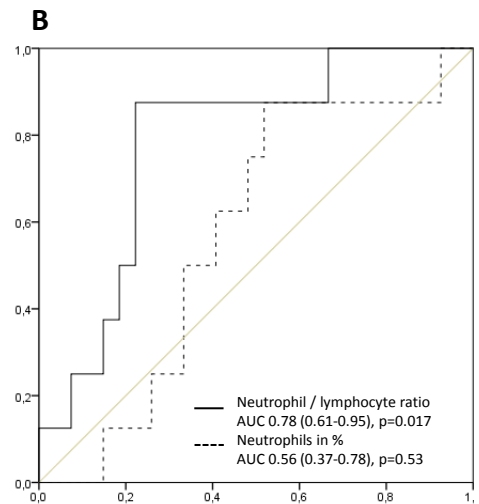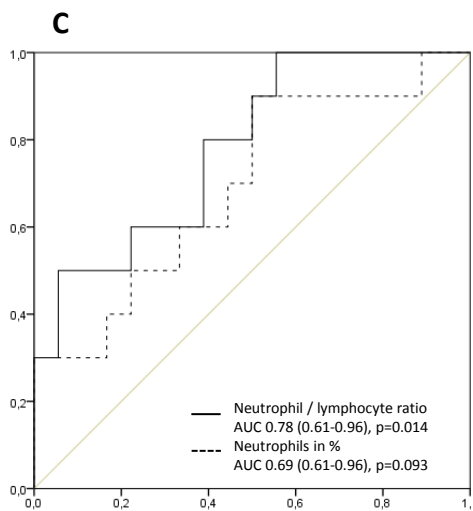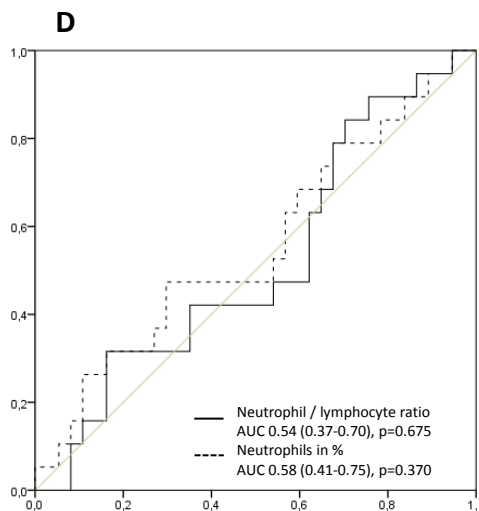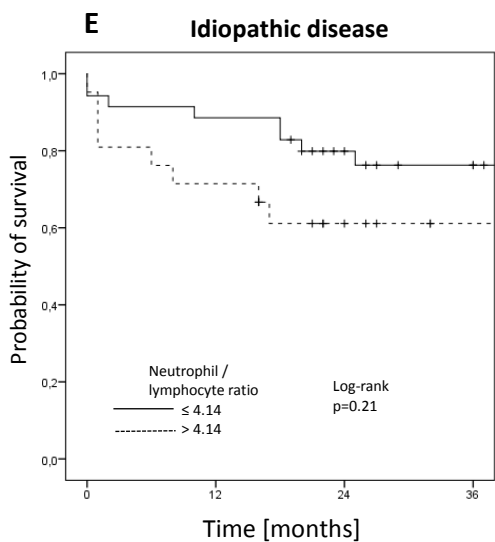

**Receiver operating characteristics (ROC) across transplantation-free survival and Kaplan-Meier survival curve in patients with idiopathic disease:** ROC analyses across the range of relative numbers of neutrophils and the neutrophil / lymphocyte ratio in all patients with PAH (A), in patients with incident PAH (B), in patients with PAH without cardiovascular risk factors (C) and in patients with idiopathic disease (D). Transplantation-free survival in patients with idiopathic disease (E).
